# Supplementary material for: Multiple fluorescence response behaviours to proteins/bacteria and selective antibacterial activity of cetylpyridinium chloride (CPC)-based cationic carbon dots
Source: Royal Society of Chemistry journal article supplement (doi:10.1039/d2ra04084k), 2022-01-01
Supplement: d2ra04084k1.pdf [file d2ra04084k1.pdf]

## Multiple fluorescence response behaviours to proteins/bacteria and selective antibacterial activity of cetylpyridinium chloride (CPC)-based cationic carbon dots

Cheng Yang<sup>a</sup>, Hao Xie<sup>\*b</sup>

a. College of Biological Science and Agriculture, Qiannan Normal University for Nationalities, Duyun 558000, Guizhou, China.

b. School of Chemistry, Chemical Engineering and Life Sciences, Wuhan University of Technology, Wuhan 430070, China. E-mail: h.xie@whut.edu.cn

### Supporting information

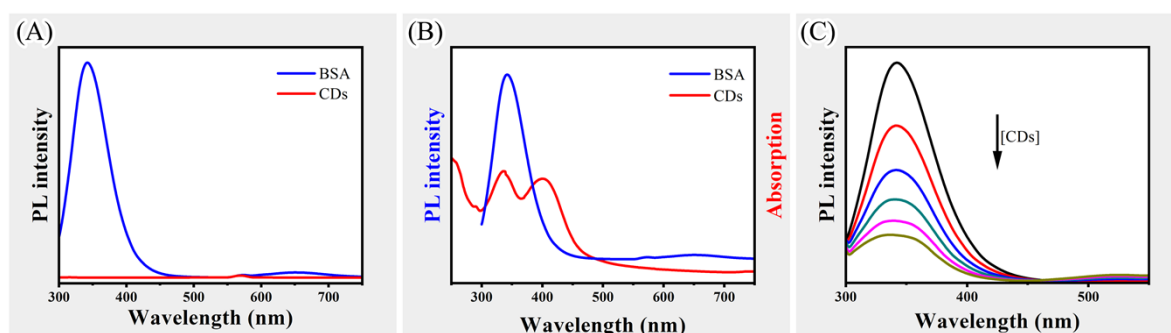

**Figure S1** Fluorescence spectrum of BSA or CDs exciting at 284 nm (A). UV-vis spectrum of CDs and fluorescence emission spectrum of the BSA (B). Fluorescence changes of BSA when interacting with various amounts of CDs (C).

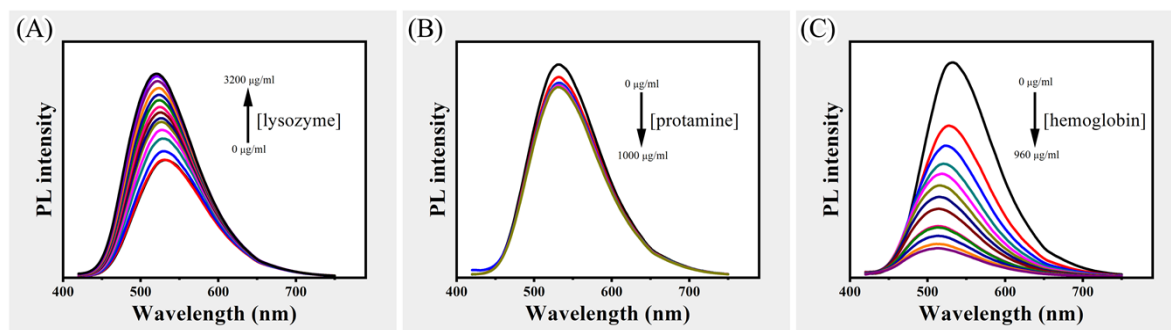

**Figure S2** Fluorescence changes of CDs when interacting different concentrations of lysozyme (A), protoamine (B) and haemoglobin (C).

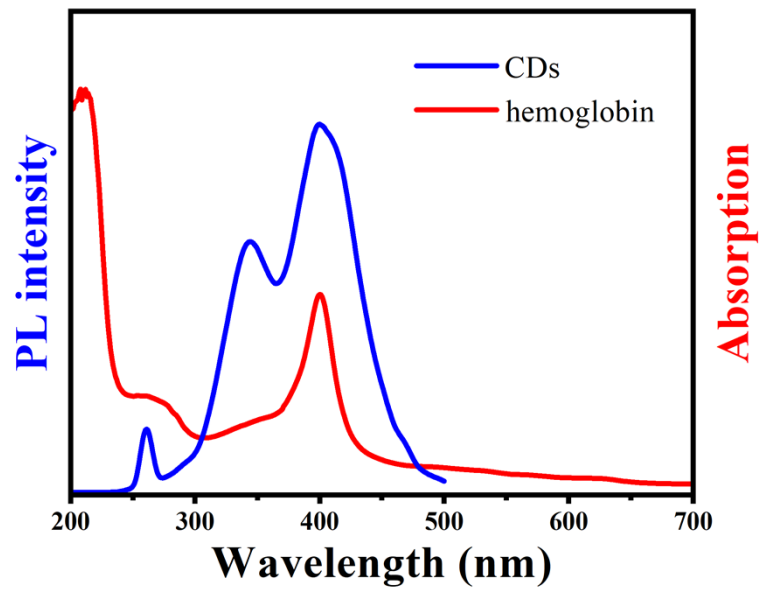

**Figure S3** PL excitation spectrum of CPC-based CDs and UV-vis spectrum of hemoglobin.
